# Supplementary material for: Transition metal-catalyzed C–H activation as a route to structurally diverse di(arylthiophenyl)-diketopyrrolopyrroles
Source: Royal Society of Chemistry journal article supplement (doi:10.1039/c2jm35398a), 2012-01-01
Supplement: c2jm35398a.pdf [file c2jm35398a.pdf]

Electronic Supplementary Information for:

**Transition metal-catalyzed C-H activation as a route to structurally diverse di(arylthiophenyl)-diketopyrrolopyrroles**

Junxiang Zhang, Dun-Yen Kang, Stephen Barlow, Seth R. Marder\*

*School of Chemistry and Biochemistry and Center for Organic Photonics and Electronics,  
Georgia Institute of Technology, Atlanta, GA 30332-0400.*

**Contents**

|                                 |     |
|---------------------------------|-----|
| 1. Experimental Details         | pS2 |
| 2. Emission Spectra             | pS6 |
| 3. Cyclic Voltammograms         | pS7 |
| 4. NMR Spectra of New Compounds | pS8 |

## 1. Experimental Details

### General

Anhydrous DMF, DMSO, DMAc and AcOH were purchased from Aldrich and used as received. Pd(OAc)<sub>2</sub> and Ag<sub>2</sub>CO<sub>3</sub> were purchased from Strem Chemicals. 2,3,5,6-Tetrafluoropyridine, 2,3,5,6-tetrafluorobenzonitrile and pentafluorobenzene were purchased from Acros or Alfa Aesar and used as received. 2,5-Dioctyl-3,6-di(thiophen-2-yl)pyrrolo[3,4-*c*]pyrrole-1,4(2*H*,5*H*)-dione (**1a**) was synthesized according to a literature procedure<sup>1</sup> from 2,5-dihydro-1,4-dioxo-3,6-dithienylpyrrolo[3,4-*c*]pyrrole, which was prepared by the reaction between 2-thiophene carbonitrile and dimethylsuccinate. Its 2,5-di(2-ethylhexyl) analogue, **1b**, was synthesized in an analogous fashion.

<sup>1</sup>H and <sup>13</sup>C{<sup>1</sup>H} NMR spectra were acquired using a Bruker AMX-400 spectrometer or a Varian Mercury Vx 300, and the signals were referenced to Me<sub>4</sub>Si at 0 ppm using either the residual <sup>1</sup>H signal or the <sup>13</sup>C signal of the solvent or internal Me<sub>4</sub>Si. Most spectra were acquired in CDCl<sub>3</sub> in 5 mm NMR tubes, but <sup>13</sup>C{<sup>1</sup>H} spectra of the fluoroaryl compounds **2a-c** were acquired in 10 mm NMR tubes using 35 mg of sample in 3 mL 1,1,2,2-CD<sub>2</sub>Cl<sub>4</sub>. Chromatographic separations were performed using standard flash column chromatography methods using silica gel purchased from Sorbent Technologies (60 Å, 32-63 μm). Electrochemical measurements were carried out under nitrogen in dry deoxygenated 0.1 M tetra-*n*-butylammonium hexafluorophosphate in dichloromethane (ca. 10<sup>-4</sup> M of analyte) using a conventional three-electrode cell with a glassy carbon working electrode, platinum wire counter electrode, and a Ag wire coated with AgCl as pseudo-reference electrode. Potentials were referenced to ferrocenium/ferrocene using internal ferrocene. Cyclic voltammograms were recorded at a scan rate of 50 mV.s<sup>-1</sup>. UV-vis-NIR spectra were recorded in 1 cm cells using a Varian Cary 5E spectrometer. Fluorescence spectra were acquired using a Horiba FluoroLog-3 spectrometer. Mass spectra were recorded on an Applied Biosystems 4700 Proteomics Analyzer by the Georgia Tech Mass Spectrometry Facility. Elemental analyses were performed by Atlantic Microlabs.

### 2,5-Dioctyl-3,6-bis(5-(2,3,5,6-tetrafluoropyridin-4-yl)thiophen-2-yl)pyrrolo[3,4-*c*]pyrrole-1,4(2*H*,5*H*)-dione (**2a**)

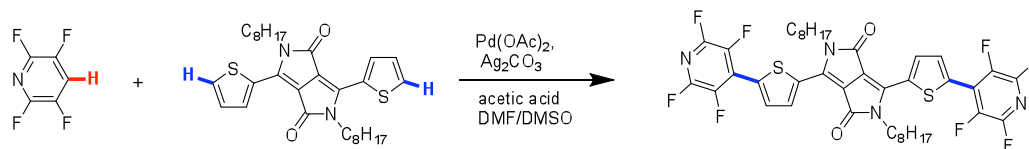

To a septum-capped 500 mL Schlenk flask were added Pd(OAc)<sub>2</sub> (22.5 mg, 0.1 mmol), Ag<sub>2</sub>CO<sub>3</sub> (1655 mg, 6 mmol), and **1a** (1050 mg, 2 mmol), followed by DMSO (10 mL) and DMF (10 mL),

1. Y. Zou, D. Gendron, R. Badrou-Aïch, A. Najari, Y. Tao, M. Leclerc, *Macromolecules* 2009, **42**, 2891

HOAc (240 mg, 4 mmol) and 2,3,5,6-tetrafluoropyridine (1813 mg, 12 mmol) with stirring. The resulting mixture was purged with N<sub>2</sub> for 30 min, screw-capped and heated to 140 °C using an oil bath. After stirring for 8 h, the reaction mixture was cooled to room temperature and diluted with hot CHCl<sub>3</sub> (2 L), filtered through Celite® (ca. 50 mL) to remove insoluble inorganic materials, washed with 1 N HCl, brine, dried over Na<sub>2</sub>SO<sub>4</sub>, filtered, and concentrated under reduced pressure. The residue was purified with silica gel chromatography (500 mL of silica gel, CHCl<sub>3</sub> as eluant) to provide **2a** as purple solid (1.3 g, 79%). <sup>1</sup>H NMR (400 MHz, CDCl<sub>3</sub>) δ 9.11 (d, *J* = 4.4 Hz, 2H), 8.03 (d, *J* = 4.4 Hz, 2H), 4.13 (t, *J* = 7.5 Hz, 4H), 1.82-1.72 (m, 4H), 1.48-1.22 (m, 20H), 0.91-0.83 (m, 6H). <sup>13</sup>C{<sup>1</sup>H} NMR (100 MHz, C<sub>2</sub>D<sub>2</sub>Cl<sub>4</sub>) δ 161.14, 144.46 (dt, *J*<sub>CF</sub> = 245, 17 Hz), 139.61, 138.92 (dd, *J*<sub>CF</sub> = 268, 35 Hz), 135.28, 134.27, 133.50, 131.05, 125.35 (t, *J*<sub>CF</sub> = 14 Hz), 110.36, 42.75, 31.78, 30.08, 29.17, 29.16, 26.90, 22.61, 14.03. HRMS (MALDI) *m/z* calcd for C<sub>40</sub>H<sub>39</sub>F<sub>8</sub>N<sub>4</sub>O<sub>2</sub>S<sub>2</sub> (MH<sup>+</sup>), 823.2387; found, 823.2395. Anal. Calc. for C<sub>40</sub>H<sub>38</sub>F<sub>8</sub>N<sub>4</sub>O<sub>2</sub>S<sub>2</sub>: C, 58.38; H, 4.65; N, 6.81. Found: C, 58.35; H, 4.63; N, 6.88.

**4,4'-(5,5'-(2,5-Dioctyl-3,6-dioxo-2,3,5,6-tetrahydropyrrolo[3,4-*c*]pyrrole-1,4-diyl)bis(thiophene-5,2-diyl))bis(2,3,5,6-tetrafluorobenzonitrile) (**2b**)**

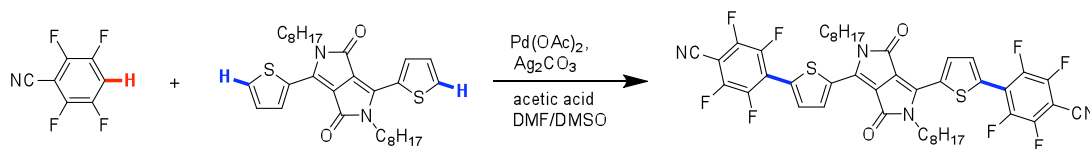

The same procedure used for **2a** was followed, but using 2,3,5,6-tetrafluorobenzonitrile in place of tetrafluoropyridine, and using 10 mol%, rather than 5 mol%, Pd(OAc)<sub>2</sub>. Purification by column chromatography with silica gel chromatography provided **2b** as a black solid (45%). <sup>1</sup>H NMR (400 MHz, CDCl<sub>3</sub>) δ 9.09 (d, *J* = 4.0 Hz, 2H), 7.93 (d, *J* = 4.0 Hz, 2H), 4.12 (t, *J* = 8.0 Hz, 4H), 1.80-1.70 (m, 4H), 1.48-1.22 (m, 20H), 0.88-0.82 (m, 6H). <sup>13</sup>C{<sup>1</sup>H} NMR (100 MHz, C<sub>2</sub>D<sub>2</sub>Cl<sub>4</sub>) δ 161.12, 147.77 (dd, *J*<sub>CF</sub> = 262, 17 Hz), 143.68 (dd, *J*<sub>CF</sub> = 255, 13 Hz), 139.52, 135.31, 133.96, 133.22, 131.03, 119.51 (t, *J* = 14 Hz), 110.28, 107.26, 92.67 (t, *J*<sub>CF</sub> = 17 Hz), 42.74, 31.77, 30.06, 29.18, 29.16, 26.89, 22.60, 14.02. HRMS (MALDI) *m/z* calcd for C<sub>44</sub>H<sub>39</sub>F<sub>8</sub>N<sub>4</sub>O<sub>2</sub>S<sub>2</sub> (MH<sup>+</sup>), 871.2387; found, 871.2359. Anal. Calc. for C<sub>44</sub>H<sub>38</sub>F<sub>8</sub>N<sub>4</sub>O<sub>2</sub>S<sub>2</sub>: C, 60.68; H, 4.40; N, 6.43. Found: C, 60.83; H, 4.42; N, 6.53.

**2,5-Dioctyl-3,6-bis(5-(perfluorophenyl)thiophen-2-yl)pyrrolo[3,4-*c*]pyrrole-1,4(2*H*,5*H*)-dione (**2c**)**

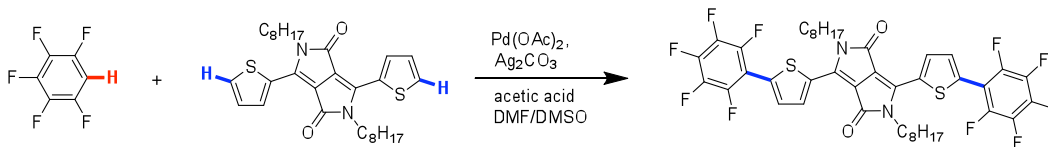

The same procedure used for **2a** was followed, but using pentafluorobenzene in place of tetrafluoropyridine. Purification by column chromatography with silica gel chromatography

provided **2c** as purple solid (23%).  $^1\text{H}$  NMR (300 MHz,  $\text{CDCl}_3$ )  $\delta$  9.03 (d,  $J = 4.2$  Hz, 2H), 7.71 (d,  $J = 4.2$  Hz, 2H), 4.10 (t,  $J = 7.8$  Hz, 4H), 1.82-1.70 (m, 4H), 1.48-1.22 (m, 20H), 0.88-0.82 (m, 6H).  $^{13}\text{C}\{^1\text{H}\}$  NMR (100 MHz,  $\text{C}_2\text{D}_2\text{Cl}_4$ )  $\delta$  160.97, 142.87-142.78 (m), 139.45-139.13 (m), 136.98-136.85 (m), 134.83, 131.78, 131.33, 131.16-131.06 (m), 109.15, 108.95-108.91 (m), 42.36, 31.50, 30.58, 29.77, 28.90, 26.62, 22.33, 13.74 (one aromatic  $^{13}\text{C}$  resonance not observed, presumably due to overlap). HRMS (MALDI)  $m/z$  calcd for  $\text{C}_{42}\text{H}_{39}\text{F}_{10}\text{N}_2\text{O}_2\text{S}_2$  ( $\text{MH}^+$ ), 857.2293; found, 857.2301. Anal. Calc. for  $\text{C}_{42}\text{H}_{38}\text{F}_{10}\text{N}_2\text{O}_2\text{S}_2$ : C, 58.87; H, 4.47; N, 3.27. Found: C, 58.52; H, 4.23; N, 3.26.

**2,5-Bis(2-ethylhexyl)-3,6-bis(5-(*m*-tolyl)thiophen-2-yl)pyrrolo[3,4-*c*]pyrrole-1,4(2*H*,5*H*)-dione (**3a**)**

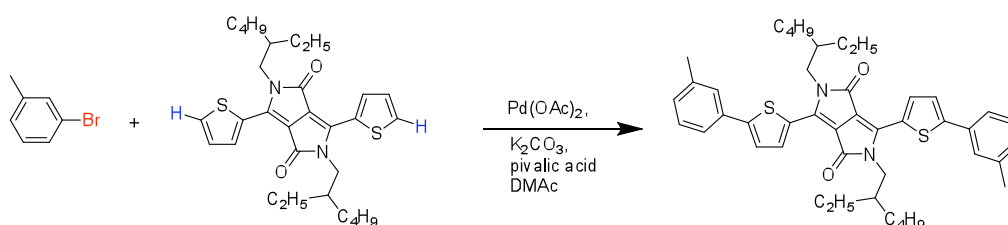

2,5-Bis(2-ethylhexyl)-3,6-di(thiophen-2-yl)pyrrolo[3,4-*c*]pyrrole-1,4(2*H*,5*H*)-dione (**1b**, 1 mmol, 524 mg),  $\text{K}_2\text{CO}_3$  (4.5 equiv, 4.5 mmol, 622 mg),  $\text{Pd}(\text{OAc})_2$  (10 mol %, 0.1 mmol, 22 mg), and pivalic acid (1 eq., 1 mmol, 102 mg) were weighed to air and placed in a round-bottomed Schlenk flask equipped with a magnetic stir bar. The flask was purged with argon for 30 min, and dimethyl acetamide (DMAc) (20 mL), 3-bromotoluene (3 mmol, 364 mg) were then added. The reaction mixture was vigorously stirred at 100 °C for 3 h, then cooled to room temperature, diluted with hot  $\text{CHCl}_3$  (300 mL), filtered through Celite<sup>®</sup> (1 cm) to remove inorganic solids, washed with brine, dried over  $\text{Na}_2\text{SO}_4$ , filtered, and concentrated under reduced pressure. The residue was purified using column chromatography (300 ml of silica gel, 50% hexane in  $\text{CHCl}_3$  as eluant) to provide **3a** as black solid (600 mg, 85%).  $^1\text{H}$  NMR (400 MHz,  $\text{CDCl}_3$ )  $\delta$  8.96 (d,  $J = 4.0$  Hz, 2H), 7.51-7.47 (m, 4H), 7.45 (d,  $J = 4.0$  Hz, 2H), 7.32 (t,  $J = 8.0$  Hz, 2H), 7.18 (d,  $J = 8.0$  Hz, 2H), 4.14-4.02 (m, 4H), 2.42 (s, 6H), 2.00-1.92 (m, 2H), 1.45-1.25 (m, 16H), 0.92-0.82 (m, 12H).  $^{13}\text{C}\{^1\text{H}\}$  NMR (100 MHz,  $\text{CDCl}_3$ )  $\delta$  161.78, 149.91, 139.91, 138.92, 136.75, 133.12, 129.66, 129.06, 128.71, 126.81, 124.40, 123.33, 108.15, 45.98, 39.26, 30.41, 28.63, 23.70, 23.14, 21.45, 14.10, 10.59. HRMS (MALDI)  $m/z$  calcd for  $\text{C}_{44}\text{H}_{52}\text{N}_2\text{O}_2\text{S}_2$  ( $\text{M}^+$ ), 704.3470; found, 704.3529. Anal. Calc. for  $\text{C}_{44}\text{H}_{52}\text{N}_2\text{O}_2\text{S}_2$ : C, 74.96; H, 7.43; N, 3.97. Found: C, 75.14; H, 7.48; N, 3.82.

**2,5-Bis(2-ethylhexyl)-3,6-bis(5-(4-methoxyphenyl)thiophen-2-yl)pyrrolo[3,4-c]pyrrole-1,4(2H,5H)-dione (3b)**

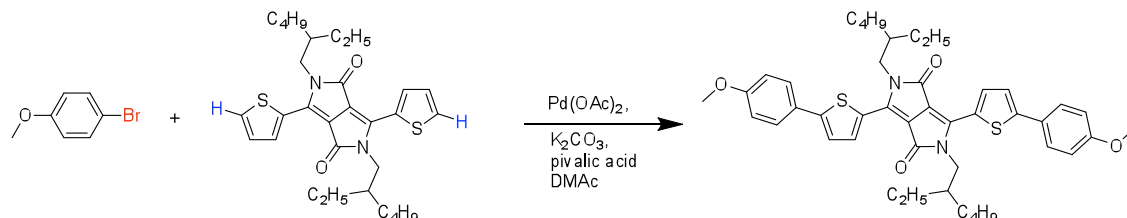

The same procedure used for **3a** was followed, but using 4-bromoanisole in place of 3-bromotoluene. Purification by column chromatography with silica gel chromatography provides **3b** as dark solid (82%).  $^1\text{H}$  NMR (400 MHz,  $\text{CDCl}_3$ )  $\delta$  8.97 (d,  $J = 4.4$  Hz, 2H), 7.64 (d,  $J = 8.8$  Hz, 4H), 7.38 (d,  $J = 4.0$  Hz, 2H), 6.98 (d,  $J = 8.8$  Hz, 4H), 4.16-4.06 (m, 4H), 3.89 (s, 6H), 2.02-1.92 (m, 2H), 1.45-1.25 (m, 16H), 0.92-0.85 (m, 12H).  $^{13}\text{C}\{^1\text{H}\}$  NMR (100 MHz,  $\text{CDCl}_3$ )  $\delta$  161.79, 160.27, 149.76, 139.77, 136.90, 127.93, 127.52, 126.05, 123.46, 114.60, 107.92, 55.45, 45.97, 39.23, 30.37, 28.58, 23.70, 23.13, 14.10, 10.61. HRMS (MALDI)  $m/z$  calcd for  $\text{C}_{44}\text{H}_{52}\text{N}_2\text{O}_4\text{S}_2$  ( $\text{M}^+$ ), 736.3368; found, 736.3362. Anal. Calc. for  $\text{C}_{44}\text{H}_{52}\text{N}_2\text{O}_4\text{S}_2$ : C, 71.70; H, 7.11; N, 3.80. Found: C, 71.85; H, 7.14; N, 3.75.

**2,5-Bis(2-ethylhexyl)-3,6-bis(5-(perfluorophenyl)thiophen-2-yl)pyrrolo[3,4-c]pyrrole-1,4(2H,5H)-dione (3c)**

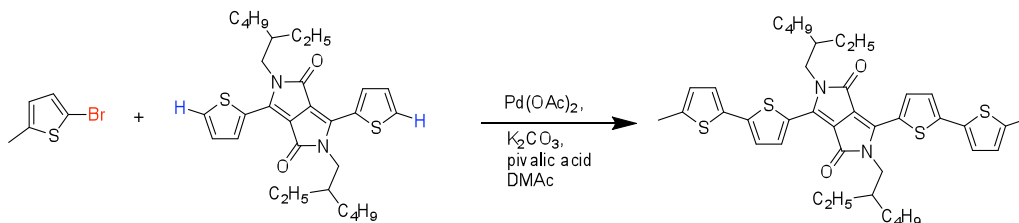

The same procedure used for **3a** was followed, using 2-bromo-5-methylthiophene in place of 3-bromotoluene. Purification by column chromatography with silica gel chromatography provided **3c** as dark solid (39%).  $^1\text{H}$  NMR (400 MHz,  $\text{CDCl}_3$ )  $\delta$  8.91 (d,  $J = 4.4$  Hz, 2H), 7.22 (d,  $J = 4.0$  Hz, 2H), 7.12 (d,  $J = 4.4$  Hz, 2H), 6.73 (dd,  $J = \text{ca. } 4, <1$  Hz, 2H), 4.10-4.00 (m, 4H), 2.52 (d,  $J < 1$  Hz, 6H), 1.94-1.88 (m, 2H), 1.38-1.22 (m, 16H), 0.90-0.85 (m, 12H). The  $^1\text{H}$  NMR spectrum is very similar to that reported for the same compound in  $\text{CD}_2\text{Cl}_2$  in ref. 2. HRMS (MALDI)  $m/z$  calcd for  $\text{C}_{40}\text{H}_{48}\text{N}_2\text{O}_2\text{S}_4$  ( $\text{M}^+$ ), 716.2599; found, 716.2590.

## 2. Emission Spectra

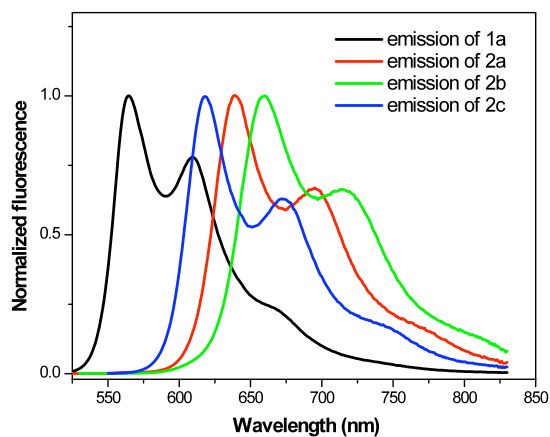

**Fig. S1.** Normalized emission spectra of compounds **1a** and **2a-c** in  $\text{CHCl}_3$  ( $\lambda_{\text{ex}} = 500$  nm).

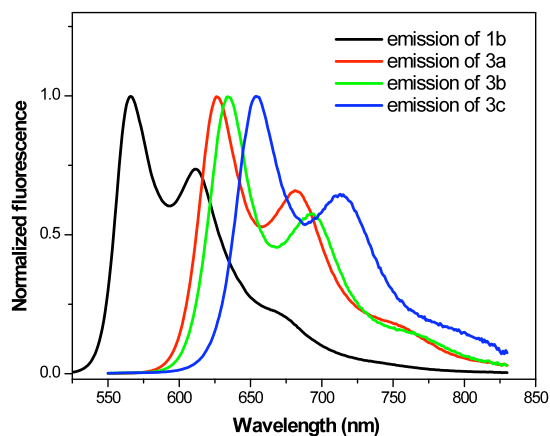

**Fig. S2.** Normalized emission spectra of compounds **1b** and **3a-c** in  $\text{CHCl}_3$  ( $\lambda_{\text{ex}} = 500$  nm).

### 3. Cyclic Voltammograms

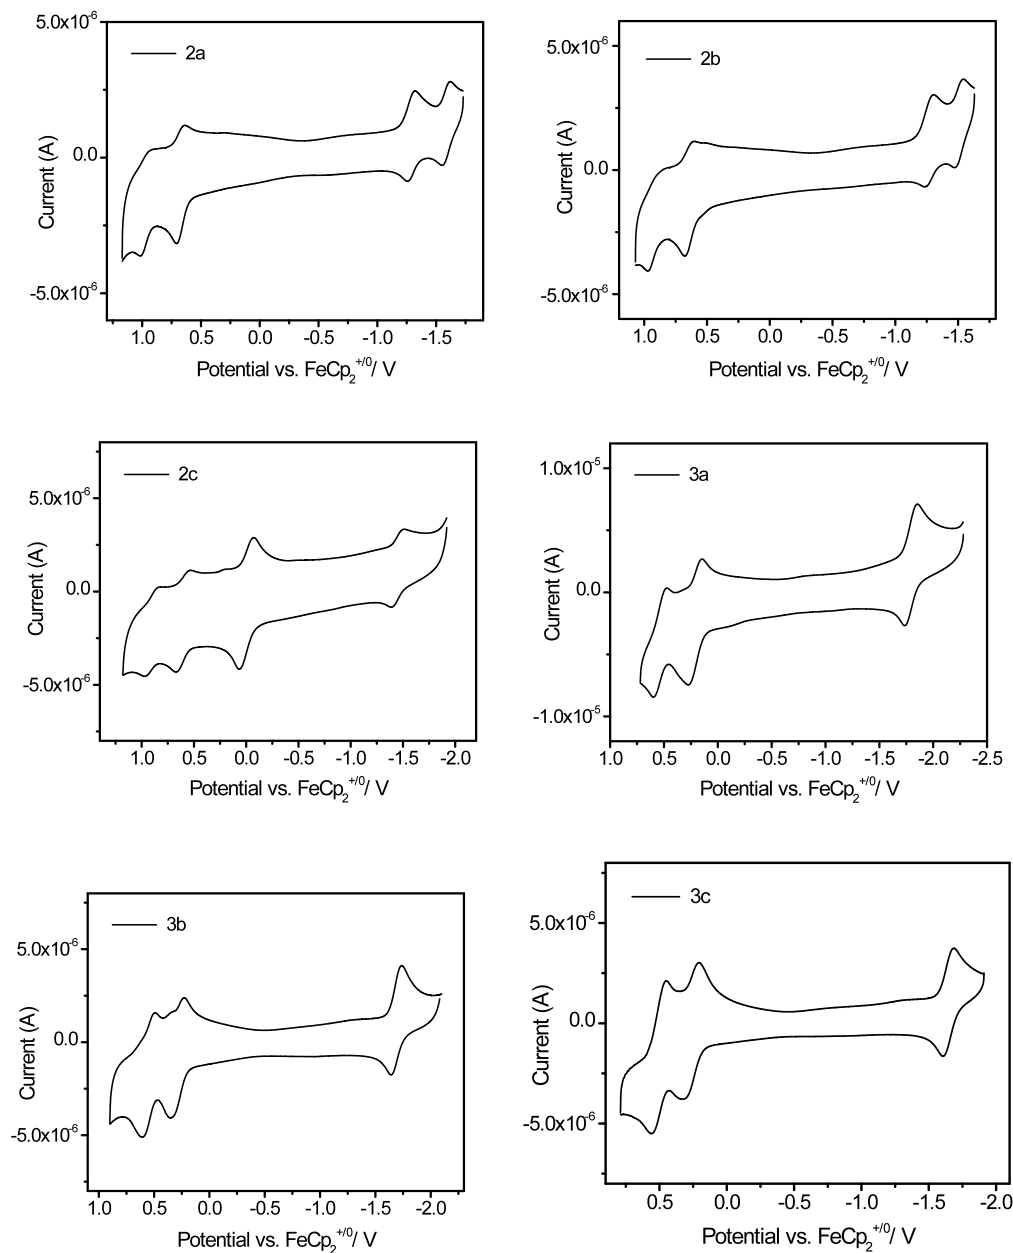

**Fig. S3.** Cyclic voltammograms of **2a-c** and **3a-b** in  $\text{CH}_2\text{Cl}_2$  / 0.1 M  $n\text{Bu}_4\text{NPF}_6$ .<sup>3</sup>

3. The sample of **2c** also contains internal ferrocene.

## 4. NMR Spectra of New Compounds

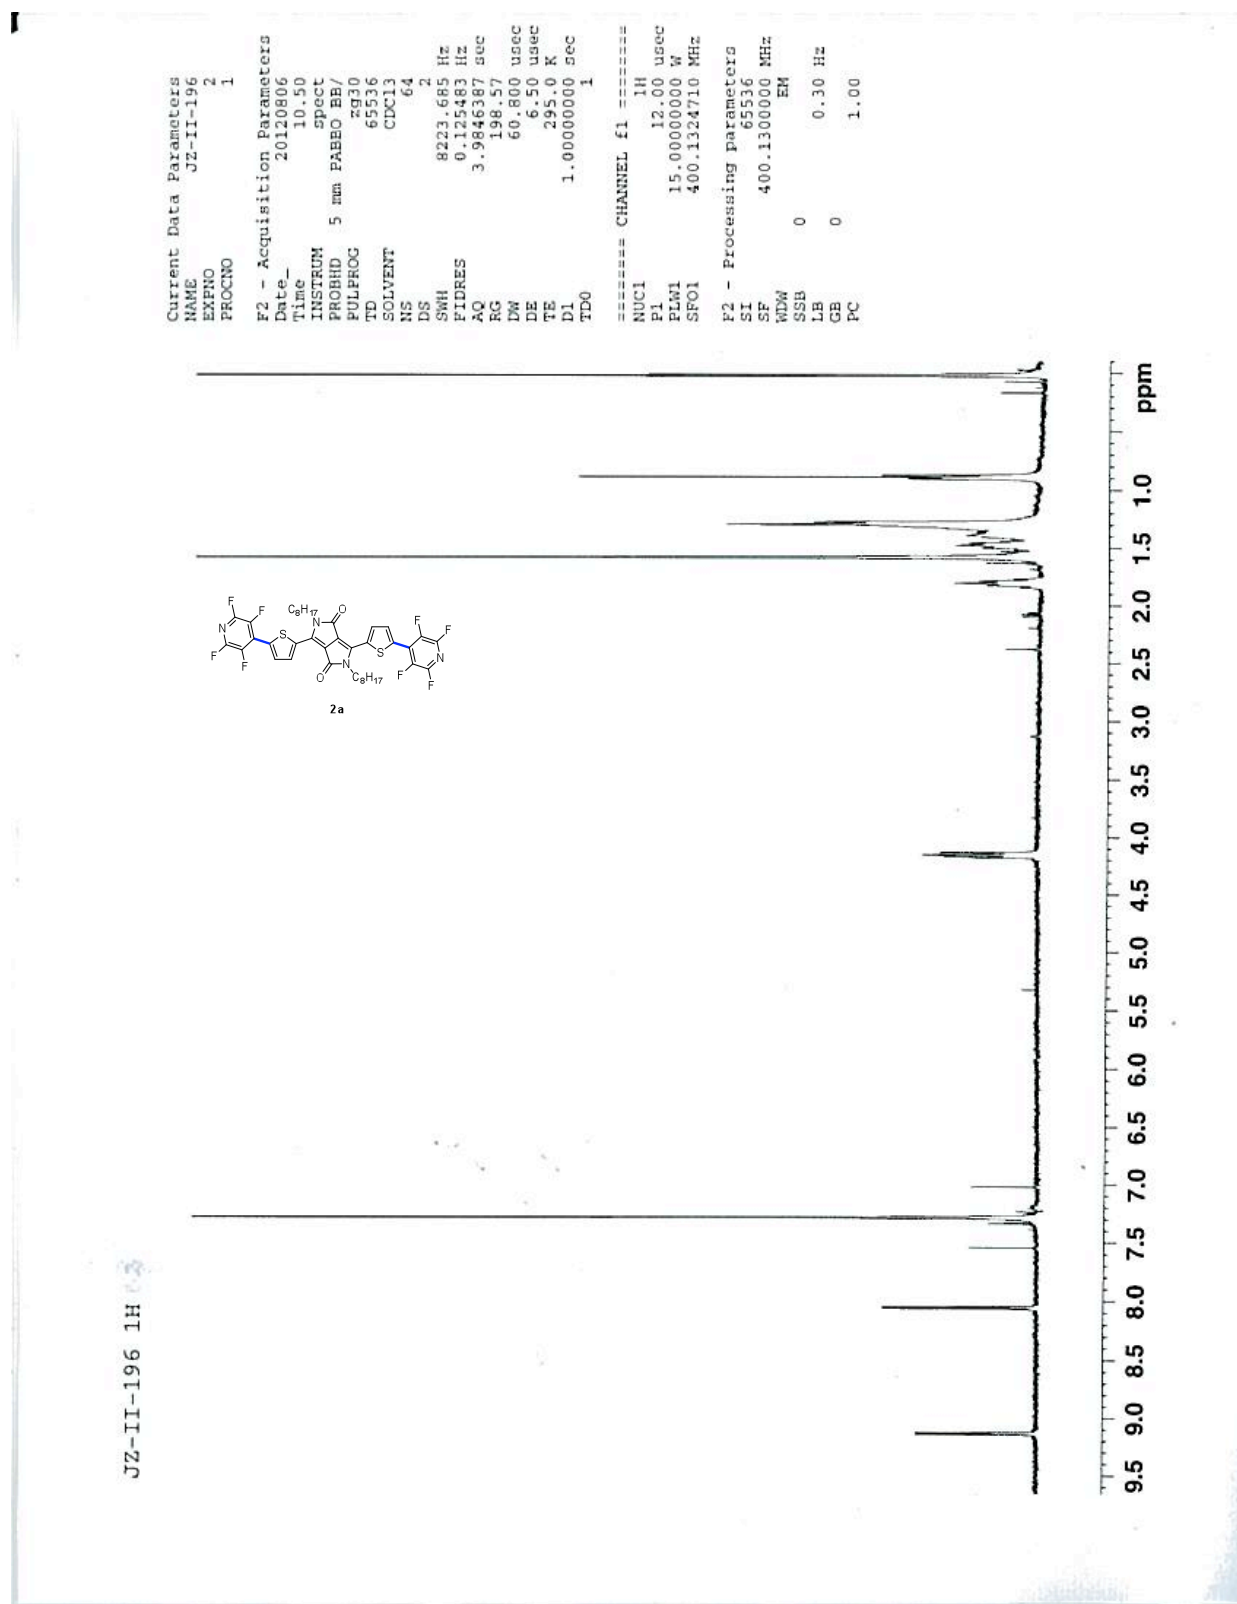



JZ-II-196 13C 10mm CD2Cl4

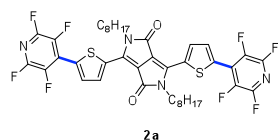

2a

```

Current Data Parameters
NAME      JZ-II-196
EXPNO     1
PROCNO    1

F2 - Acquisition Parameters
Date_     20120803
Time      17.24
INSTRUM   spect
PROBHD    10 mm BBO BH/D
PULPROG   zgpg30
TD         65536
SOLVENT   C2Cl4D2
NS         40479
DS         0
SWH        24038.461 Hz
FIDRES     0.366798 Hz
AQ         1.3631988 sec
RG         198.57
DW         20.800 usec
DE         6.50 usec
TE         353.2 K
D1         1.00000000 sec
D11        0.03000000 sec
TD0        1

===== CHANNEL f1 =====
NUC1       13C
P1         18.50 usec
PLM1       40.00000000 W
SFO1       100.628293 MHz

===== CHANNEL f2 =====
CPDPRG2    waltz16
NUC2        1H
PCPD2       110.00 usec
PLM2       26.50000000 W
PLM12      1.20949996 W
PLM13      1.46350002 W
SFO2       400.1316005 MHz

F2 - Processing parameters
SI         32768
SF         100.6127690 MHz
WDW        EM
SSB        0
LB         1.00 Hz
GB         0
PC         1.40
    
```

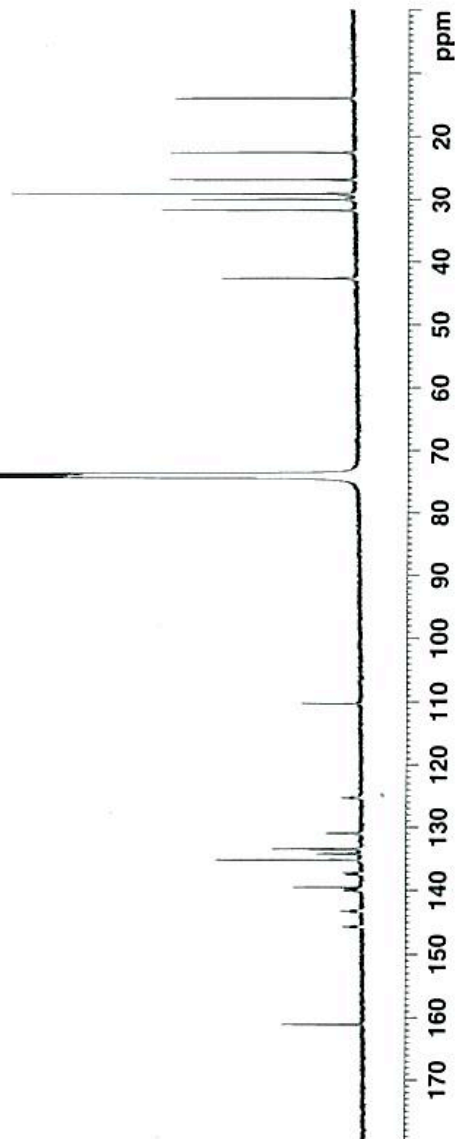

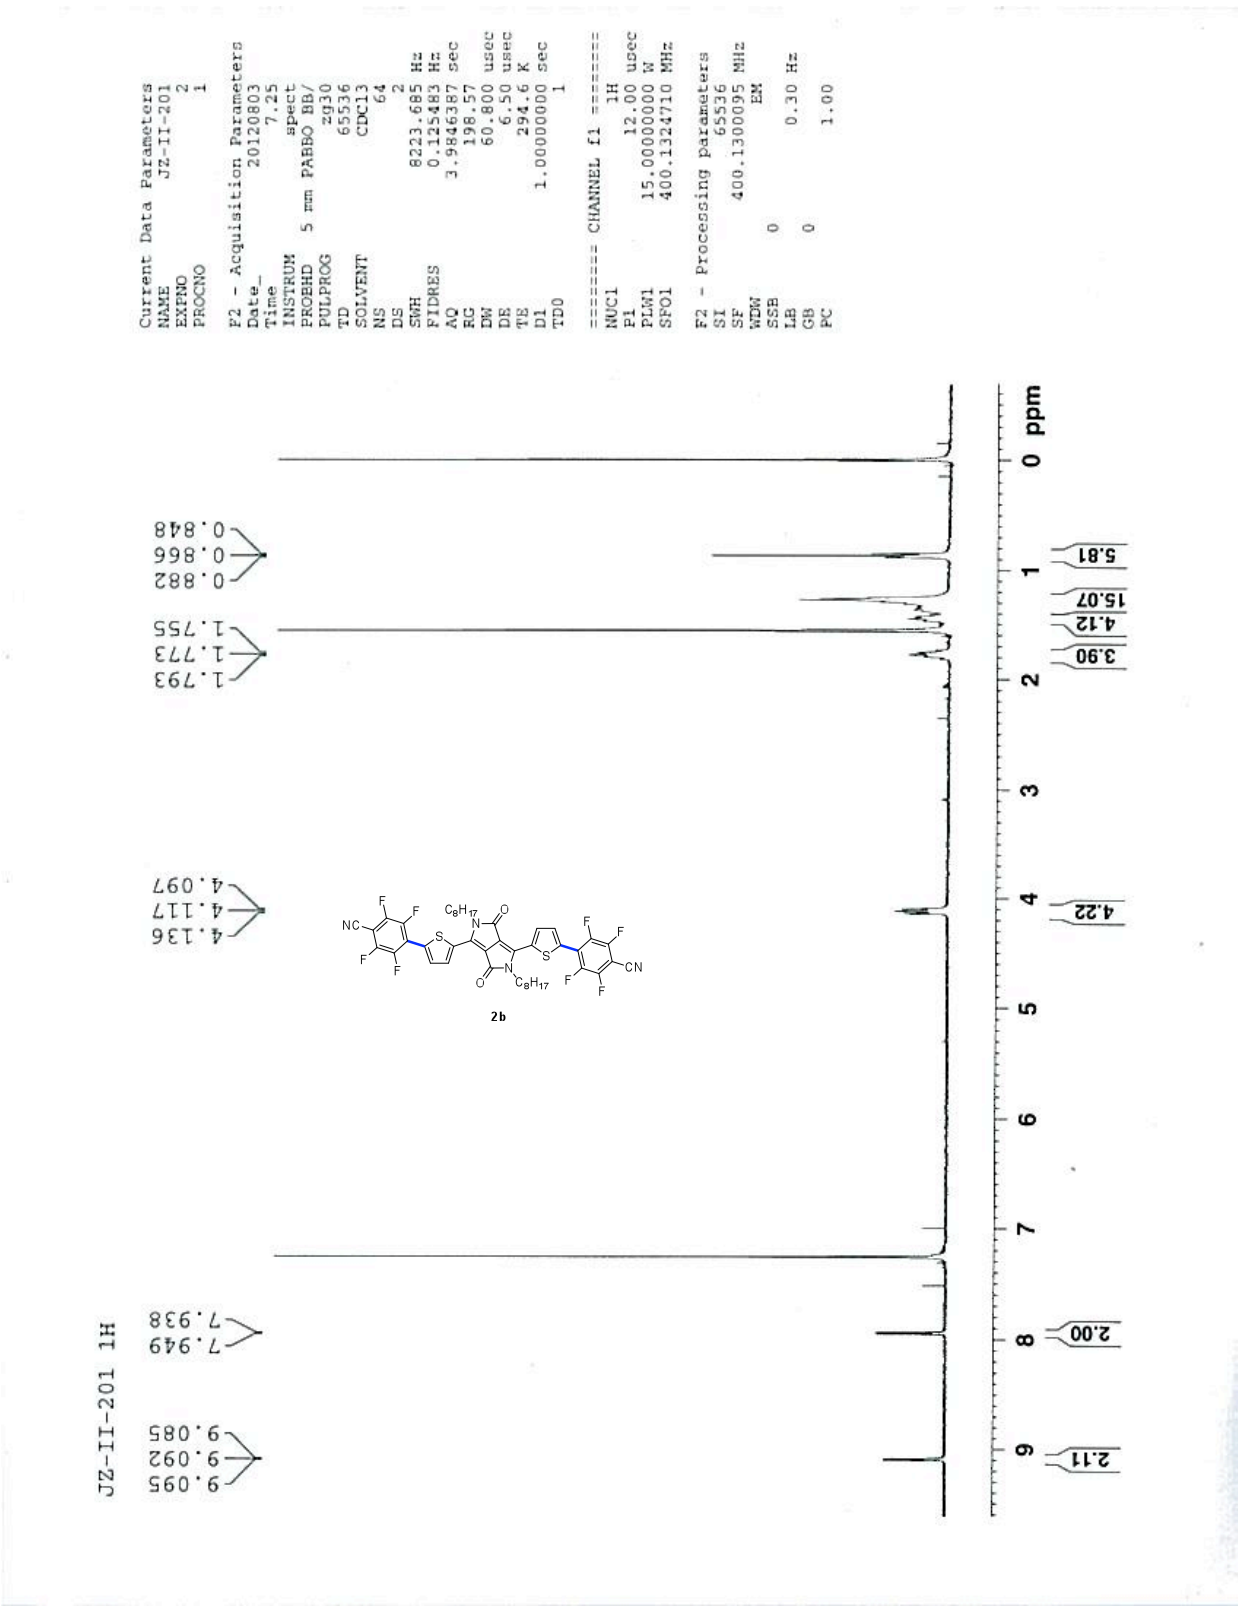

JZ-II-201 13C 10mm

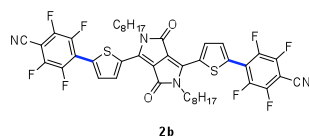

2b

Current Data Parameters  
NAME JZ-II-201  
EXPNO 3  
PROCNO 1

F2 - Acquisition Parameters  
Date\_ 20120804  
Time 21.01  
INSTRUM spect  
PROBHD 10 mm BBO BB/D  
PULPROG zgpg30  
TD 65536  
SOLVENT C2C14D2  
NS 50056  
DS 0  
SWH 24038.461 Hz  
FIDRES 0.366798 Hz  
AQ 1.3631988 sec  
RG 198.57  
DM 20.800 use  
DE 6.50 use  
TE 353.2 K  
D1 1.0000000 sec  
D11 0.0300000 sec  
TD0 1

===== CHANNEL f1 =====  
NUC1 13C  
P1 18.50 use  
PLW1 40.0000000 W  
SFO1 100.6228293 MHz

===== CHANNEL f2 =====  
CPDPRG2 waltz16  
NUC2 1H  
PCPD2 110.00 use  
PLW2 26.5000000 W  
PLW12 1.20949996 W  
PLW13 1.46350002 W  
SFO2 400.1316005 MHz

F2 - Processing parameters  
SI 32768  
SF 100.6127690 MHz  
WDW EM  
SSB 0  
LB 1.00 Hz  
GB 0  
PC 1.40

200 180 160 140 120 100 80 60 40 20 0 ppm

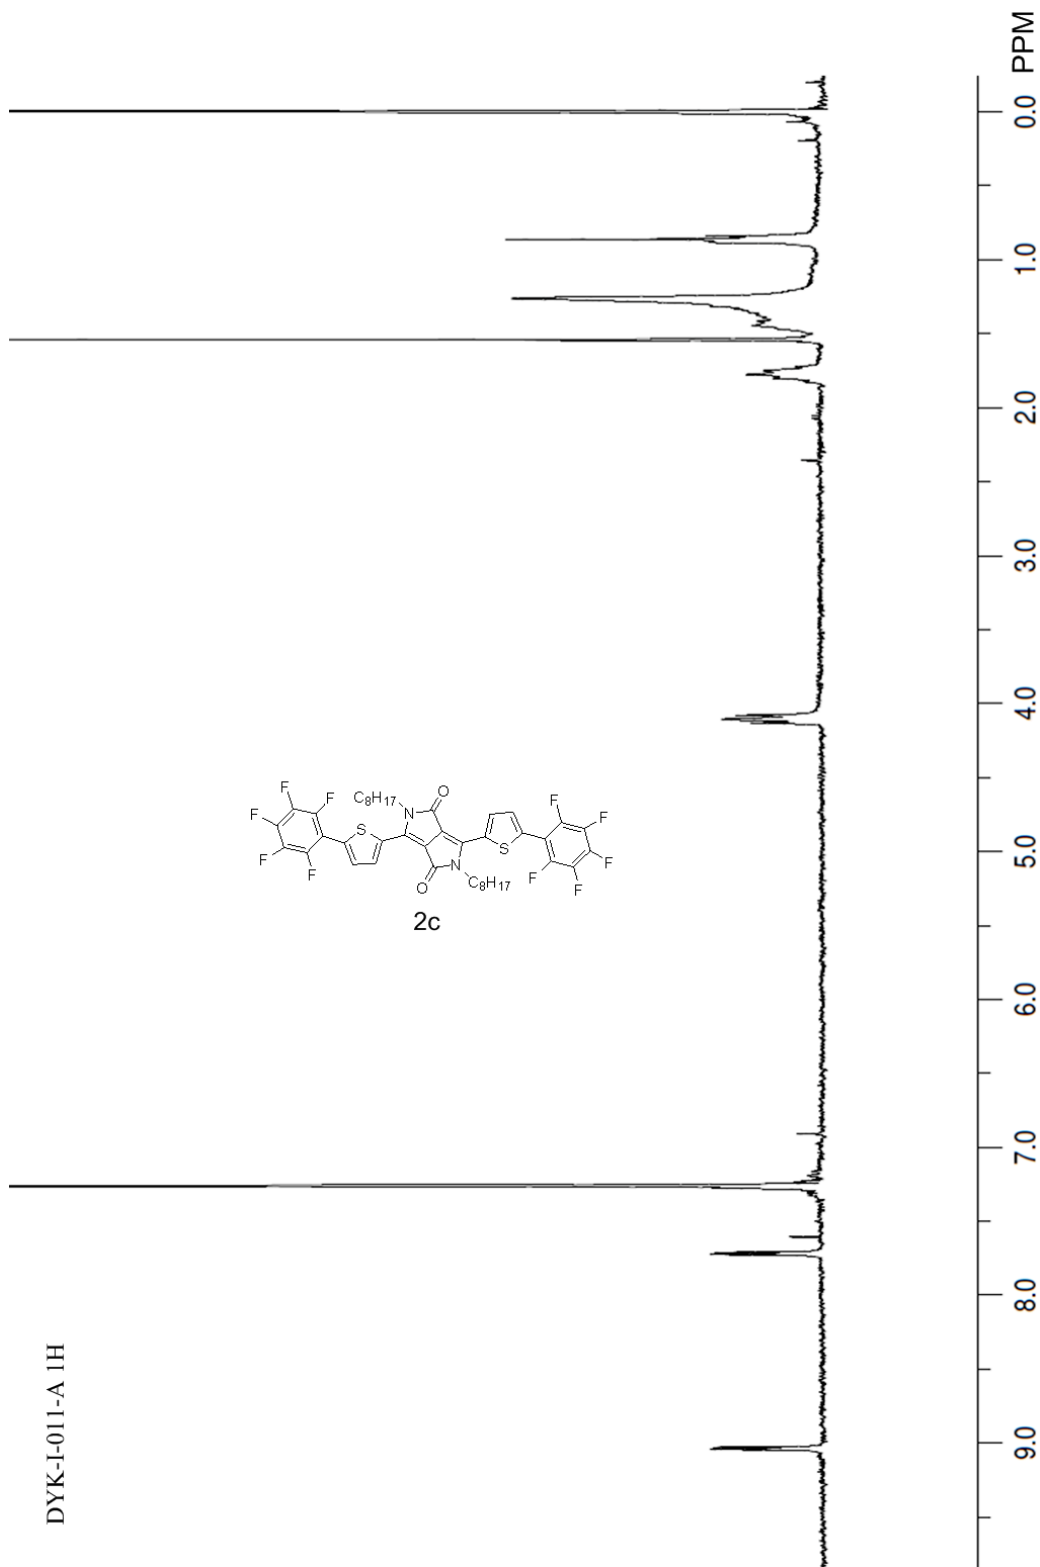

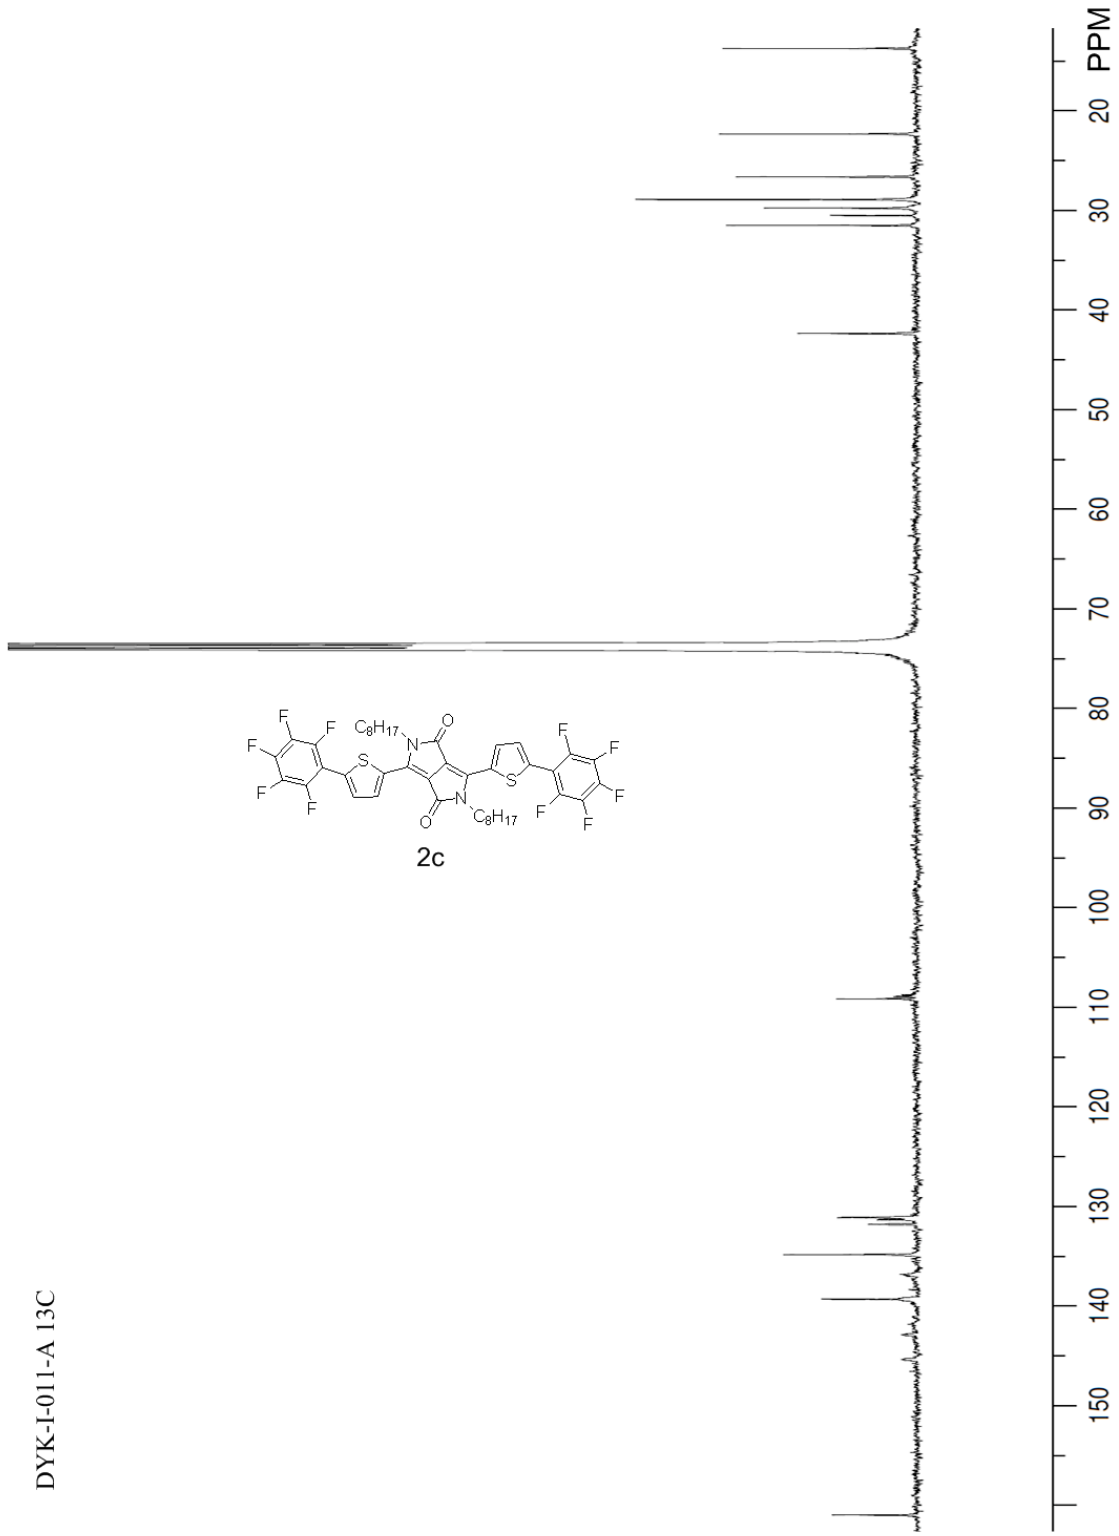

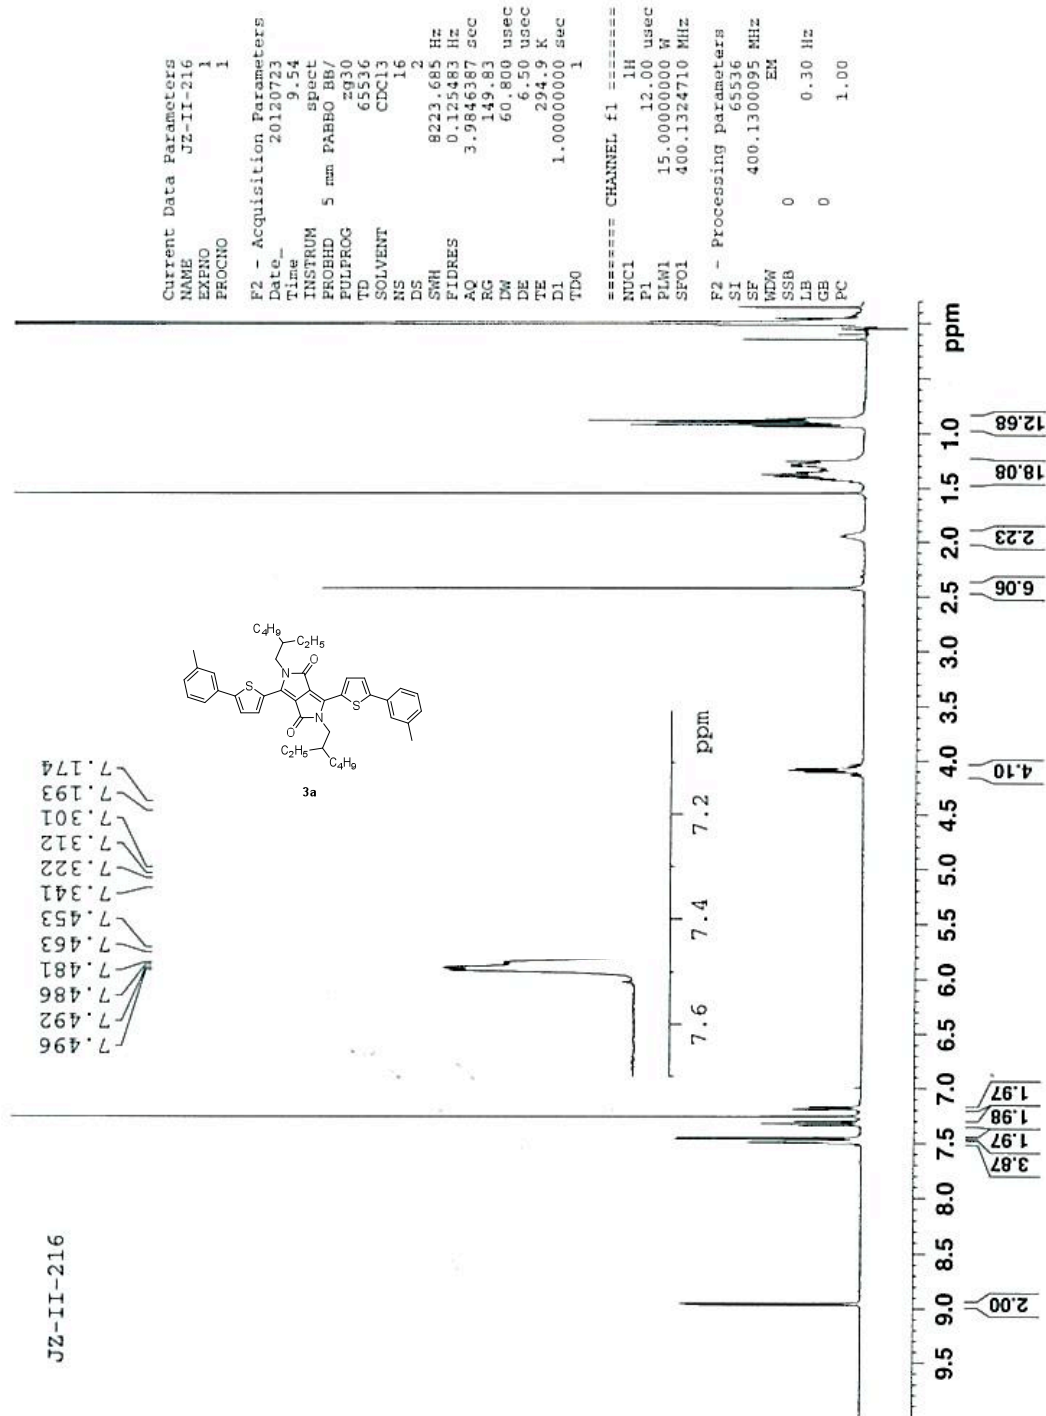

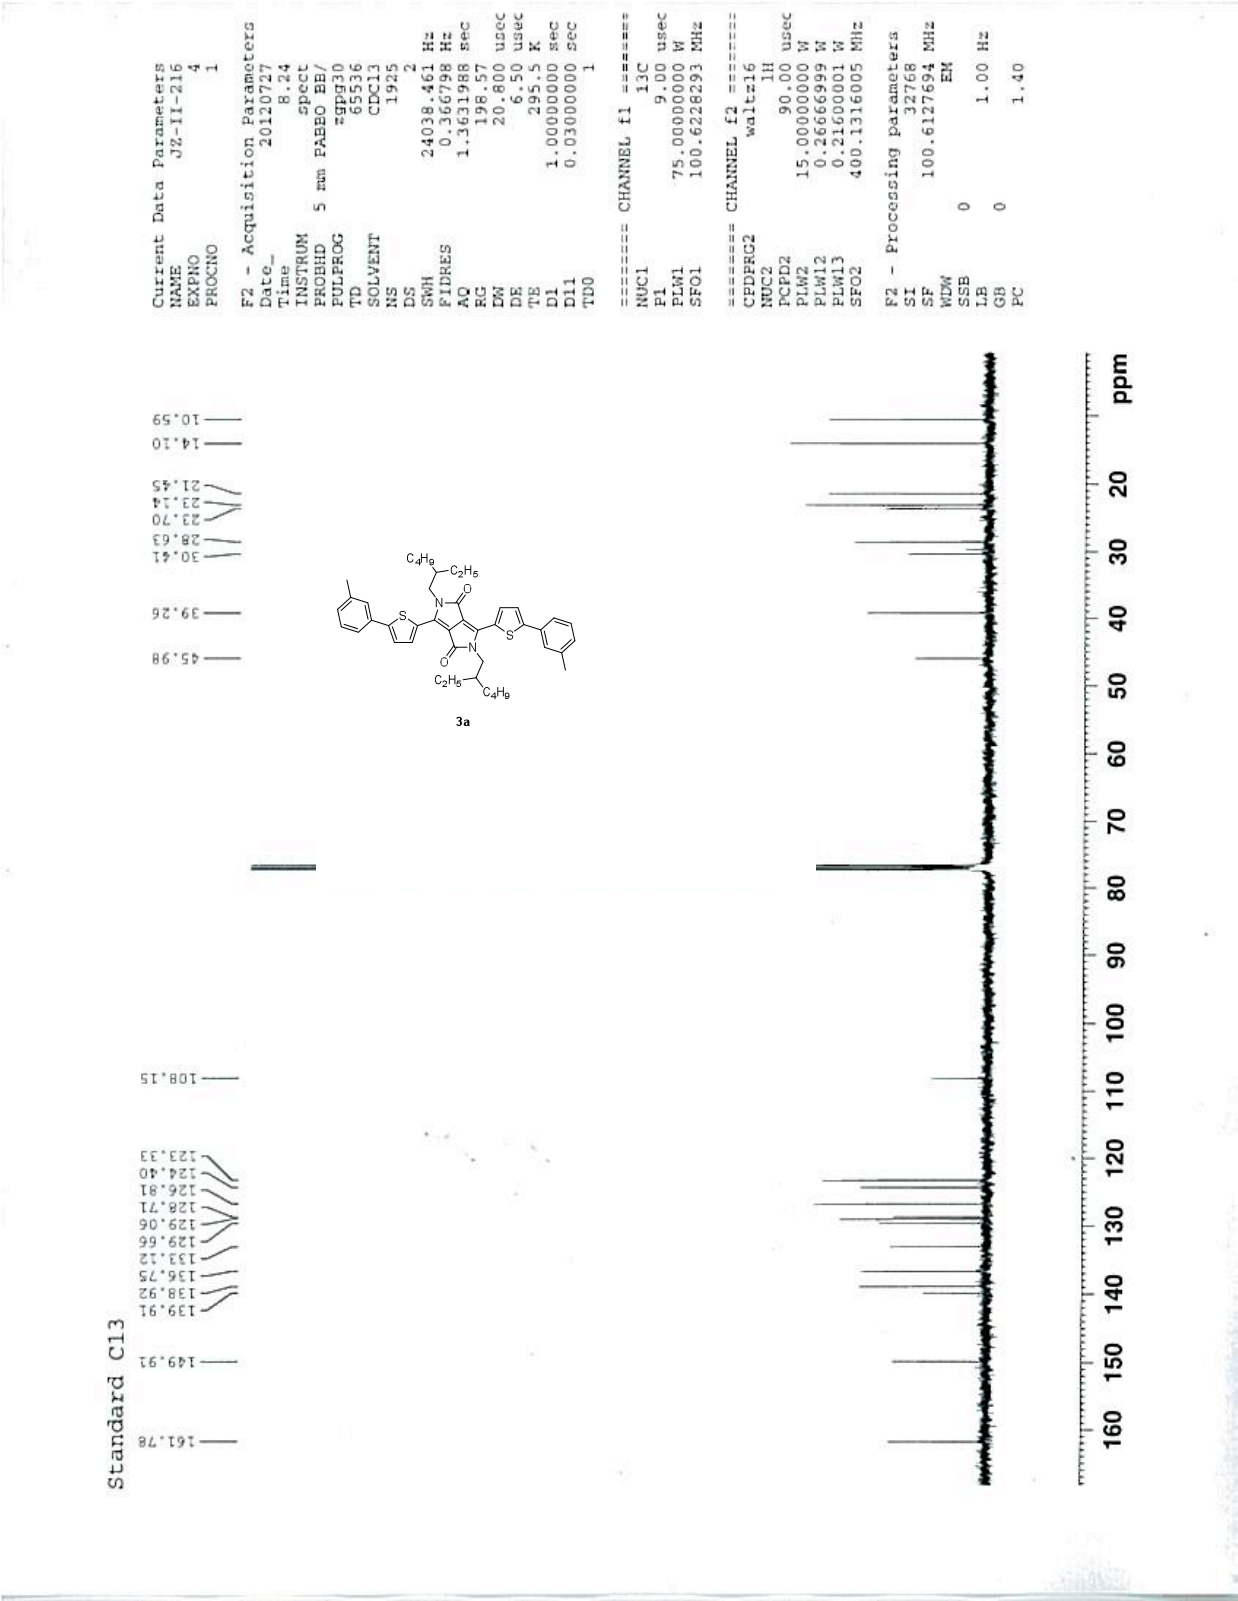

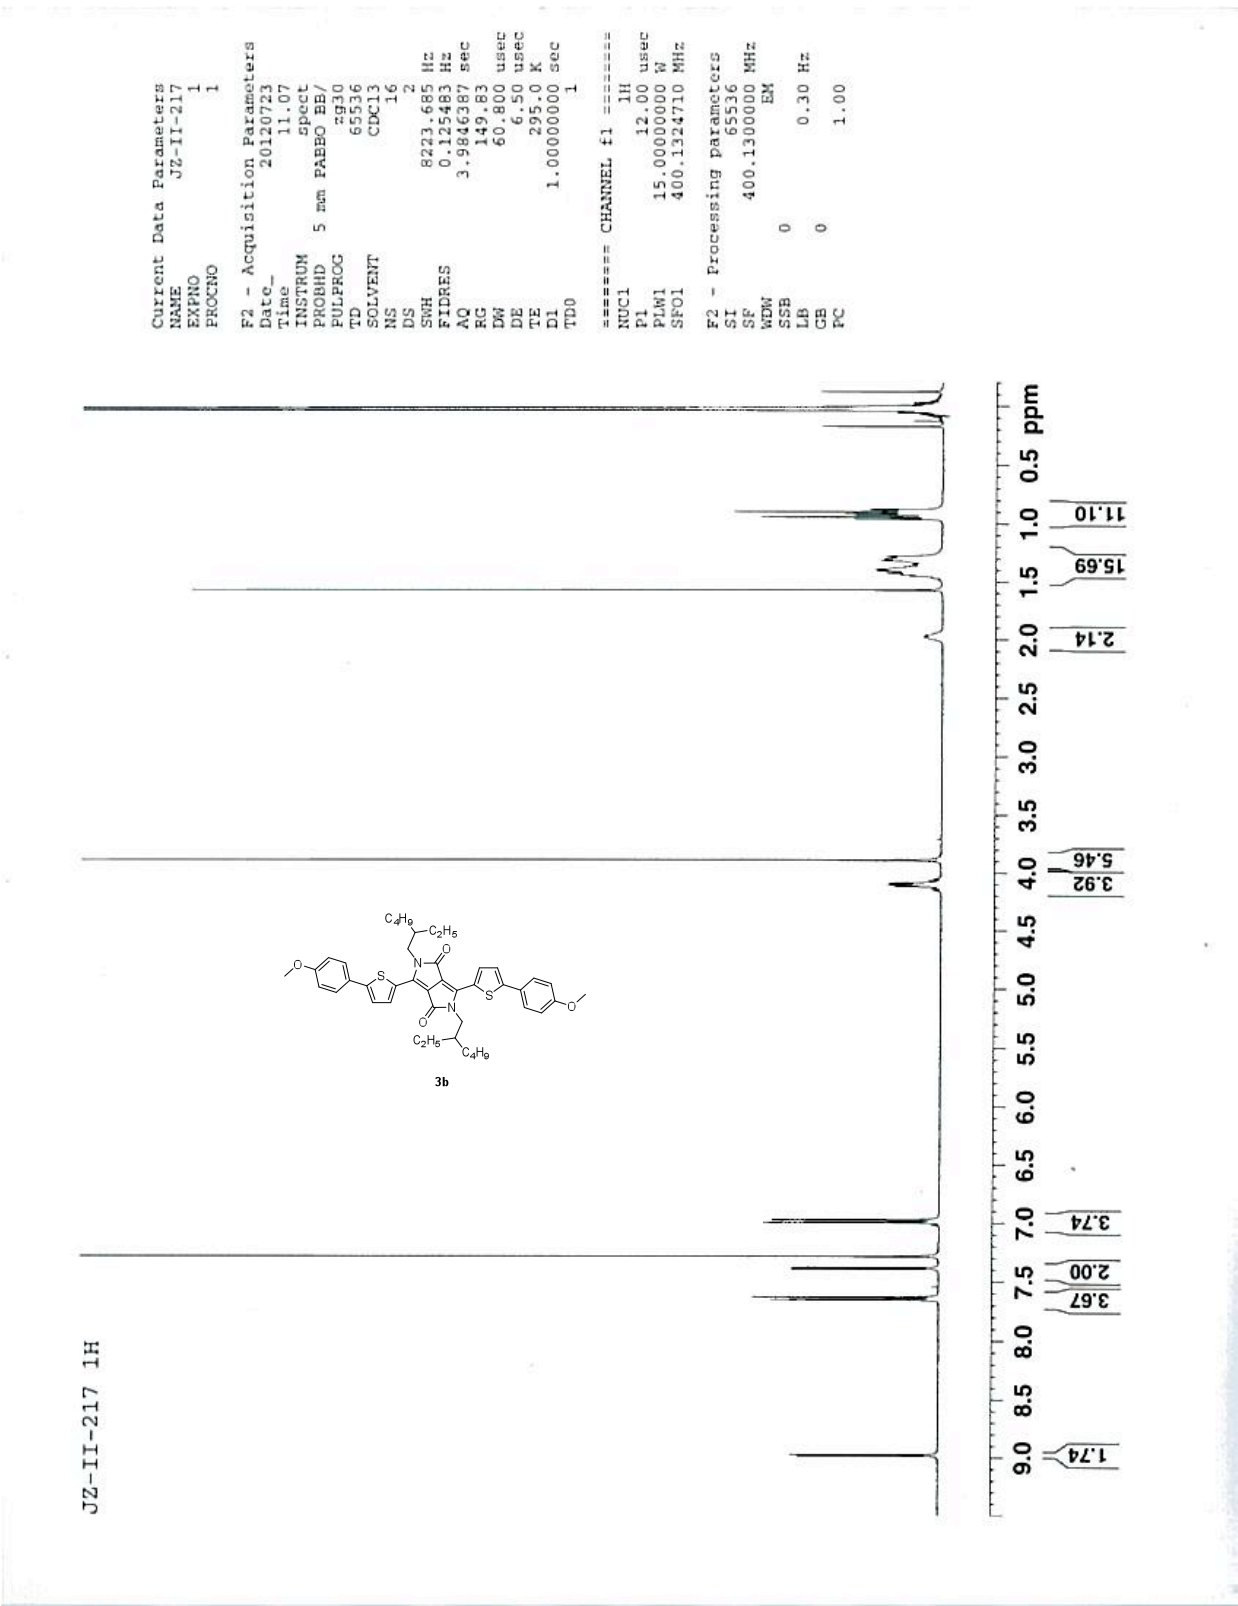



JZ-II-217 C13

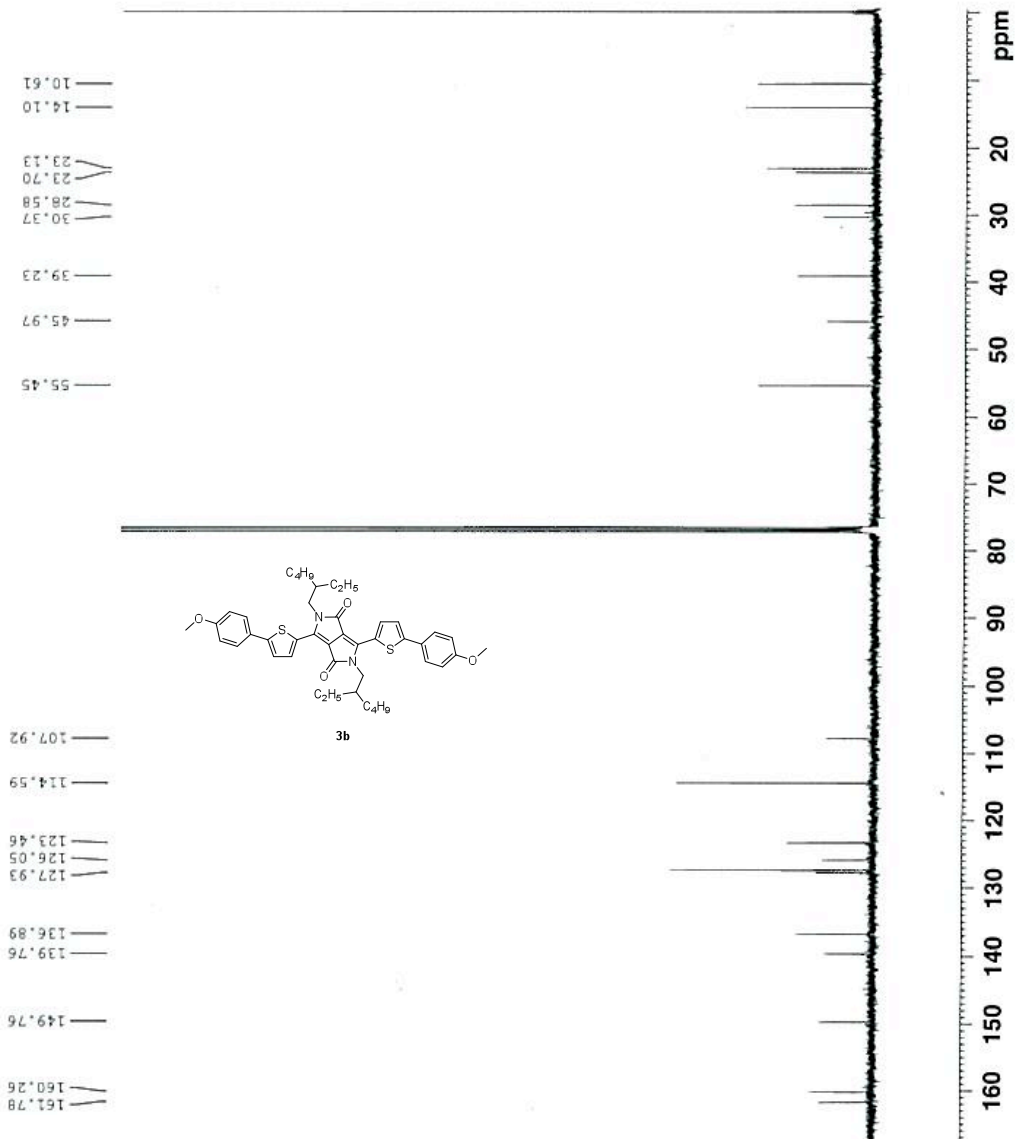

Current Data Parameters  
NAME JZ-II-217  
EXPNO 4  
PROCNO 1

F2 - Acquisition Parameters  
Date\_ 20120724  
Time 17.55  
INSTRUM spect  
PROBHD 5 mm PABBO BB/  
PULPROG zgpg30  
TD 65536  
SOLVENT CDCl3  
NS 1801  
DS 2  
SWH 24038.461 Hz  
FIDRES 0.366798 Hz  
AQ 1.3631988 sec  
RG 198.57  
DW 20.800 usec  
DE 6.50 usec  
TE 295.7 K  
D1 1.0000000 sec  
D11 0.0300000 sec  
TD0 1

===== CHANNEL f1 =====  
NUC1 13C  
P1 9.00 usec  
PLW1 75.0000000 W  
SFO1 100.6228293 MHz

===== CHANNEL f2 =====  
CPDPRG2 waltz16  
NUC2 1H  
PCPD2 90.00 usec  
PLW2 15.0000000 W  
PLW12 0.2666699 W  
PLW13 0.2160000 W  
SFO2 400.1316005 MHz

F2 - Processing Parameters  
SI 32768  
SF 100.6127690 MHz  
WDW EM  
SSB 0  
LB 1.00 Hz  
GB 0  
PC 1.40
